# Supplementary material for: ABCA4midigenes reveal the full splice spectrum of all reported noncanonical splice site variants in Stargardt disease
Source: HighWire-hosted journal article supplement (doi:10.1101/gr.226621.117), 2017-11-21

## Supplemental Figure S4

**Supplemental Figure S4.** Splice defect due to c.768G>T in photoreceptor precursor cells. The c.768G>T variant results in 30 bp elongation of exon 6 when tested in BA4 WT and mutant clones using *RHO* exon 3 and exon 5 primers (Supplemental Table S10). Same splice defect was observed in mRNA of photoreceptor precursor cells (PPCs) of a patient carrying this variant in a homozygous state. Human retina RNA was used as a control.

**A.**

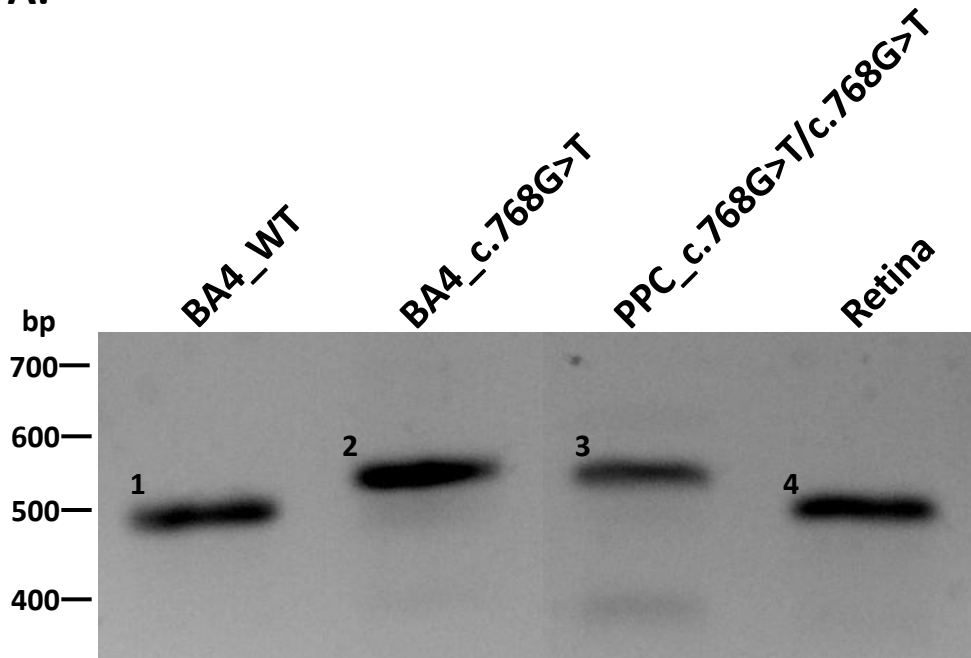

**B.**

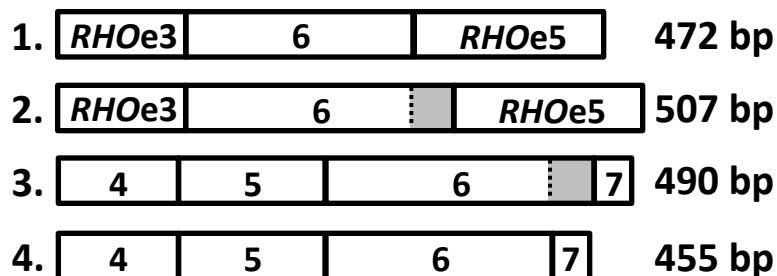

Supplement: Supplemental_Fig_S4_.pdf [file Supplemental_Fig_S4_.pdf]
