# Supplementary material for: ABCA4midigenes reveal the full splice spectrum of all reported noncanonical splice site variants in Stargardt disease
Source: HighWire-hosted journal article supplement (doi:10.1101/gr.226621.117), 2017-11-21
Supplement: Supplemental_Table_S4_.pdf [file Supplemental_Table_S4_.pdf]

**Supplemental\_Table\_S4.** Correlation between splice site variants and clinical features in STGD1 patients.

All variants were previously found in a compound heterozygous manner (Cornelis et al. 2017 and references therein), except for eight variants, i.e. c.160+5G>C, c.302+4A>C, c.768G>T, c.4253+4C>T, c.4667G>C, c.5461-10T>C, c.5461-8T>G and c.6729+5\_6729+19del. When clinical information was available for the homozygous cases, this was used to assess the severity of the corresponding variant. If more than one patient carried a variant, we assessed the clinical phenotype of the case(s) for which the second variant was known, and if this variant could be classified either as severe variant (stop mutation, frameshift mutation, canonical splice site mutation) or as mild variant based on statistics (p.[Gly863Ala, Gly863del], p.(Ala1038Val), p.(Gly1961Glu), c.5714+5G>A, and p.(Arg2030Gln)(Cornelis et al. 2017). A non-canonical splice variant was deemed mild if the second allele was severe and the patient showed an intermediate STGD1 phenotype. It was considered severe if the second allele was severe and the patient showed early-onset STGD1 (onset  $\leq$  10 yrs). The variant was also considered severe if the second allele was mild and the patient showed an intermediate STGD1 phenotype. For 25/47 variants, we observed concordance between the *in vitro* splice assay result and the clinical assessment in one or more patients; for 22/47 variants a conclusion was not possible.

| DNA variant         | % correctly spliced mRNA | Classification variant based on RNA splice study | Number of alleles in ABCA4 LOVD | Classification NCSS variant based on clinical data | Concordance variant classification | Reference (PMID)                                                            |
|---------------------|--------------------------|--------------------------------------------------|---------------------------------|----------------------------------------------------|------------------------------------|-----------------------------------------------------------------------------|
| c.160+5G>C          | 34,3                     | Moderate                                         | 3                               | Moderate                                           | Yes                                | Sciezynska et al. 2015 (26593885)                                           |
| c.161G>T            | 0                        | Severe                                           | 1                               | n.a.                                               | n.a.                               | Oishi et al. 2014 (25324289)                                                |
| c.302+4A>C          | 0                        | Severe                                           | 4                               | Severe                                             | Yes                                | Siemiatkowska et al. 2011 (22128245)                                        |
| c.303-3C>G          | 0                        | Severe                                           | 0 <sup>1</sup>                  | Severe                                             | Yes                                | This study                                                                  |
| c.768G>T            | 0                        | Severe                                           | 140                             | Severe                                             | Yes                                | Maugeri et al. 1999 (10090887)                                              |
| c.859-9T>C          | 75,7                     | Mild                                             | 6                               | Mild                                               | Yes                                | Duncker et al. 2015 ( 26551331); Alapati et al. 2014 (25082885); this study |
| c.1100-6T>A         | 0                        | Severe                                           | 1                               | n.a.                                               | n.a.                               | Zernant et al. 2011 (21911583)                                              |
| c.1937+13T>G        | 14#                      | Severe                                           | 0 <sup>1</sup>                  | n.a.                                               | n.a.                               | This study                                                                  |
| c.2382+5G>C*        | 47,9#                    | Moderate                                         | 1                               | n.a.                                               | n.a.                               | Riveiro-Alvarez et al. 2013 (23755871)                                      |
| c.2588G>C*          | 60#                      | Mild <sup>2</sup>                                | 291                             | Mild                                               | Yes                                | Maugeri et al. 1999 (10090887); Zernant et al. 2017 (28446513)              |
| c.2919-10T>C        | 61,1                     | Moderate                                         | 0 <sup>3</sup>                  | n.a.                                               | n.a.                               | Schulz et al. 2017 (28118664)                                               |
| c.2919-6C>A         | 79,6                     | Mild                                             | 1                               | n.a.                                               | n.a.                               | Ozgul et al. 2004 (15108289)                                                |
| c.3050+5G>A         | 0                        | Severe                                           | 13                              | Severe                                             | Yes                                | Rivera et al. 2000 (10958763)                                               |
| c.3522+5del         | 53,0                     | Moderate                                         | 2                               | Moderate                                           | Yes                                | Zernant et al. 2011 (21911583)                                              |
| c.3607G>A           | 10,9                     | Severe                                           | 1                               | n.a.                                               | n.a.                               | Stennirri et al. 2004 (15192030)                                            |
| c.3607+3A>T         | 0                        | Severe                                           | 1                               | Severe                                             | Yes                                | Boulanger-Scemama et al. 2015 (26103963)                                    |
| c.3812A>G           | 0                        | Severe                                           | 1                               | n.a.                                               | n.a.                               | Zernant et al. 2011 (21911583)                                              |
| c.3813G>C           | 0                        | severe                                           | 1                               | n.a.                                               | n.a.                               | Lambertus et al. 2015 (25444351)                                            |
| c.3862+3A>G         | 53,4                     | Moderate                                         | 1                               | n.a.                                               | n.a.                               | Alapati et al. 2014 (25082885)                                              |
| c.4128G>A           | 0                        | Severe                                           | 1                               | n.a.                                               | n.a.                               | Passerini et al. 2010 (19265867)                                            |
| c.4253+4C>T         | 7,8                      | Severe                                           | 13                              | Severe                                             | Yes                                | Sanchez et al. 2014 (25342620)                                              |
| c.4253+5G>A         | 0                        | Severe                                           | 11                              | Severe                                             | Yes                                | Paloma et al. 2001 (11385708)                                               |
| c.4253+5G>T         | 5,4                      | Severe                                           | 4                               | Severe                                             | Yes                                | Lewis et al. 1999 (9973280)                                                 |
| c.4538A>G           | 0\$                      | Severe                                           | 2                               | n.a.                                               | n.a.                               | Fujinami et al. 2013 (23982839)                                             |
| c.4538A>C           | 4,3\$                    | Severe                                           | 1                               | Severe                                             | Yes                                | Fishman et al. 1999 (10206579)                                              |
| c.4634G>A           | 100                      | Benign                                           | 1                               | n.a.                                               | n.a.                               | Fujinami et al. 2013 (23982839)                                             |
| c.4667G>C           | 0                        | Severe                                           | 2                               | Moder./Severe                                      | Yes                                | Chacon-Camacho et al. 2013 (23419329)                                       |
| c.4773G>C           | 0                        | Severe                                           | 2                               | n.a.                                               | n.a.                               | Fujinami et al. 2013 (23982839)<br>Burke et al. 2014 (24677105)             |
| c.4773+3A>G         | 24,6                     | Severe                                           | 8                               | Moder./Severe                                      | Yes                                | Miraldi et al. 2014 (24457364)                                              |
| c.4773+5G>A         | 29,1                     | Severe                                           | 1                               | Severe                                             | Yes                                | Duno et al. 2012 (22229821)                                                 |
| c.5196+3_5196+6del  | 0                        | Severe                                           | 1                               | Severe                                             | Yes                                | Kitiratschky et al. 2008 (18285826)                                         |
| c.5196+3_5196+8del  | 100                      | Benign                                           | 1                               | n.a.                                               | n.a.                               | Rozet et al. 1998 (9781034)                                                 |
| c.5312+3A>T         | 0                        | Severe                                           | 2                               | Severe                                             | Yes                                | Xi et al. 2009 (19352439)                                                   |
| c.5313-3C>G         | 0                        | Severe                                           | 1                               | Severe                                             | Yes                                | Downes et al. 2012 (23143460)                                               |
| c.5460+5G>A         | 0                        | Severe                                           | 1                               | n.a.                                               | n.a.                               | Riveiro-Alvarez et al. 2013 (23755871)                                      |
| c.5461-10T>C        | 0                        | Severe                                           | 214                             | Severe                                             | Yes                                | Sangermano et al. 2016 (26976702)                                           |
| c.5461-8T>G         | 0                        | Severe                                           | 0 <sup>1</sup>                  | Severe                                             | Yes                                | This study                                                                  |
| c.5584G>C           | 0                        | Severe                                           | 1                               | n.a.                                               | n.a.                               | Huang et al. 2015 (25356976)                                                |
| c.5584+5G>A         | 0                        | Severe                                           | 6                               | n.a.                                               | n.a.                               | Webster et al. 2001 (11328725)                                              |
| c.5584+6T>C         | 0                        | Severe                                           | 5                               | n.a.                                               | n.a.                               | Rosenberg et al. 2007 (17982420)                                            |
| c.5585-10T>C        | 100                      | Benign                                           | 2                               | n.a.                                               | n.a.                               | Rosenberg et al. 2007 (17982420)                                            |
| c.5714+5G>A         | 39,8                     | Moderate                                         | 116                             | Moder./Mild <sup>4</sup>                           | Yes                                | Cremers et al. 1998 (9466990); Cornelis et al. 2017 (28044389)              |
| c.5836-3C>A         | 0                        | Severe                                           | 1                               | Severe                                             | Yes                                | Sciezynska et al. 2015 (26593885)                                           |
| c.5898+5del         | 4,5                      | Severe                                           | 2                               | Severe                                             | Yes                                | Sodi et al. 2010 (20128570)                                                 |
| c.6478A>G           | 55,2                     | Moderate                                         | 2                               | n.a.                                               | n.a.                               | Duno et al. 2012 (22229821)                                                 |
| c.6479+4A>G         | 0                        | Severe                                           | 1                               | n.a.                                               | n.a.                               | Huang et al. 2015 (25356976)                                                |
| c.6729+5_6729+19del | 0                        | Severe                                           | 4                               | Severe                                             | Yes                                | Littink et al. 2010 (20554613)                                              |

In general, we classified variants as severe if the correctly splice RNA is present in <30% of the products, moderately severe if between 30% and 70%, and mild if >70%. <sup>1</sup>These variants were not listed in the *ABCA4* LOVD (<http://www.LOVD.nl/ABCA4>) but present in STGD1 patients described in this study. <sup>2</sup>The variant c.2588G>C (p.[Gly863Ala, Gly863del]) was deemed mild in previous studies (Maugeri et al. 1999) and recently was found to only be penetrant as a mild allele when in *cis* with c.5603A>T (p.(Asn1868Ile))(Zernant et al. 2017). <sup>3</sup>This variant was published after the *ABCA4* LOVD was made. <sup>4</sup>The non-canonical splice site variant c.5714+5G>A based on homozygosity analysis was classified as a mild *ABCA4* variant (Cornelis et al. 2017) but in some reported cases clearly shows a moderately severe character (Cremers et al. 1998). For variants c.2382+5G>C and c.2588G>C, nomenclature does not include the skipping of *ABCA4* exon 15 (\*). For variants c.1937+13T>G and c.2382+5G>C, the percentage of correctly spliced mRNA was determined by densitometry (Supplemental Table S12), and for variant c.2588G>C by direct analysis of Sanger sequence traces (#). NCSS, non-canonical splice site; n.a.: not applicable. In the NCSS variant classification it denotes that no conclusion could be drawn as the severity of the second allele was not known or when there were no detailed clinical data available. In the concordance variant classification column it indicates that a correlation analysis was not possible. For variants c.4538A>C and c.4538A>G, the percentage of correctly spliced mRNA was not entirely determined due to likely co-migrating gel fragments of similar size (\$).
